# Supplementary material for: The Impact of Non-Lethal Single-Dose Radiation on Tumor Invasion and Cytoskeletal Properties
Source: Int J Mol Sci. 2017 Sep 18;18(9):2001. doi: 10.3390/ijms18092001 (PMC5618650; doi:10.3390/ijms18092001)
Supplement: Supplementary file 1 [file ijms-18-02001-s001.zip]

Archive with 5 entries (5 files):
- LN229 CTL.avi
- suppl..pdf
- U87 2 Gy.avi
- U87 CTL.avi
- LN229 2 Gy.avi
